# Supplementary material for: Epithelial-To-Mesenchymal Transition Markers and CD44 Isoforms Are Differently Expressed in 2D and 3D Cell Cultures of Prostate Cancer Cells
Source: Cells. 2019 Feb 11;8(2):143. doi: 10.3390/cells8020143 (PMC6406374; doi:10.3390/cells8020143)
Supplement: Supplementary file 1 [file cells-08-00143-s001.pdf]

# Epithelial-To-Mesenchymal Transition Markers and CD44 Isoforms Are Differently Expressed in 2D and 3D Cell Cultures of Prostate Cancer Cells

Fabrizio Fontana <sup>1,†</sup>, Michela Raimondi <sup>1,†</sup>, Monica Marzagalli <sup>1</sup>, Michele Sommariva <sup>2</sup>, Patrizia Limonta <sup>1,‡</sup> and Nicoletta Gagliano <sup>2,‡,\*</sup>

Supplementary Materials:

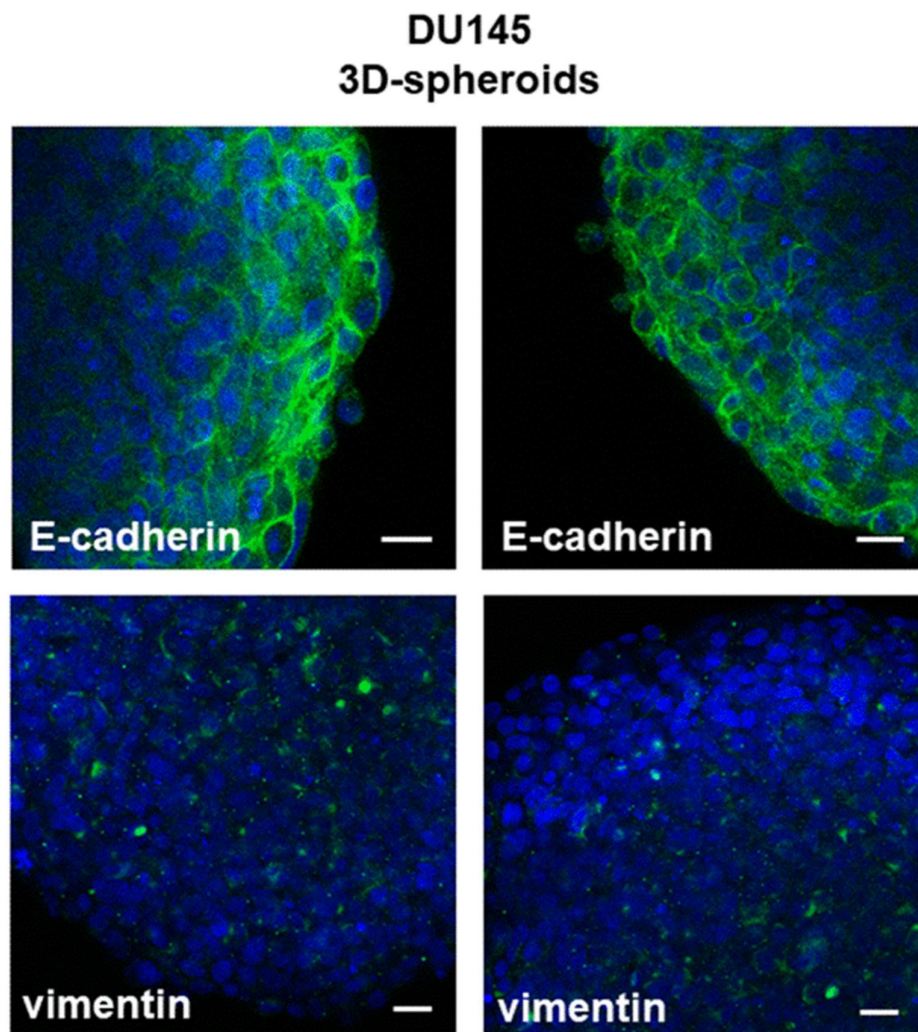

**Figure S1.** Immunofluorescence analysis of EMT markers in DU145 3D-spheroids. Micrographs using the confocal microscope showing the epithelial marker E-cadherin and mesenchymal marker vimentin (green) in DU145 cells grown in in 3D-spheroids. Immunoreactivity for E-cadherin is more intense in the periphery of the spheroid, whilst vimentin is mostly expressed in the deep regions of the spheroid. Original magnification: 40x. Bar: 20  $\mu$ m. Blue: DAPI.
